# Supplementary material for: Nano α-NiMoO4as a new electrode for electrochemical supercapacitors
Source: Royal Society of Chemistry journal article supplement (doi:10.1039/c2ra22743f), 2012-11-23
Supplement: c2ra22743f.pdf [file c2ra22743f.pdf]

## Nano $\alpha$ -NiMoO<sub>4</sub> as New Electrode for Electrochemical Supercapacitors

Baskar Senthilkumar,<sup>a,b</sup> Kalimuthu Vijaya Sankar,<sup>a</sup> Ramakrishnan Kalai Selvan,<sup>\*a</sup> Meyrick Danielle<sup>b</sup> and Minakshi Manickam<sup>b</sup>

### Supporting Information

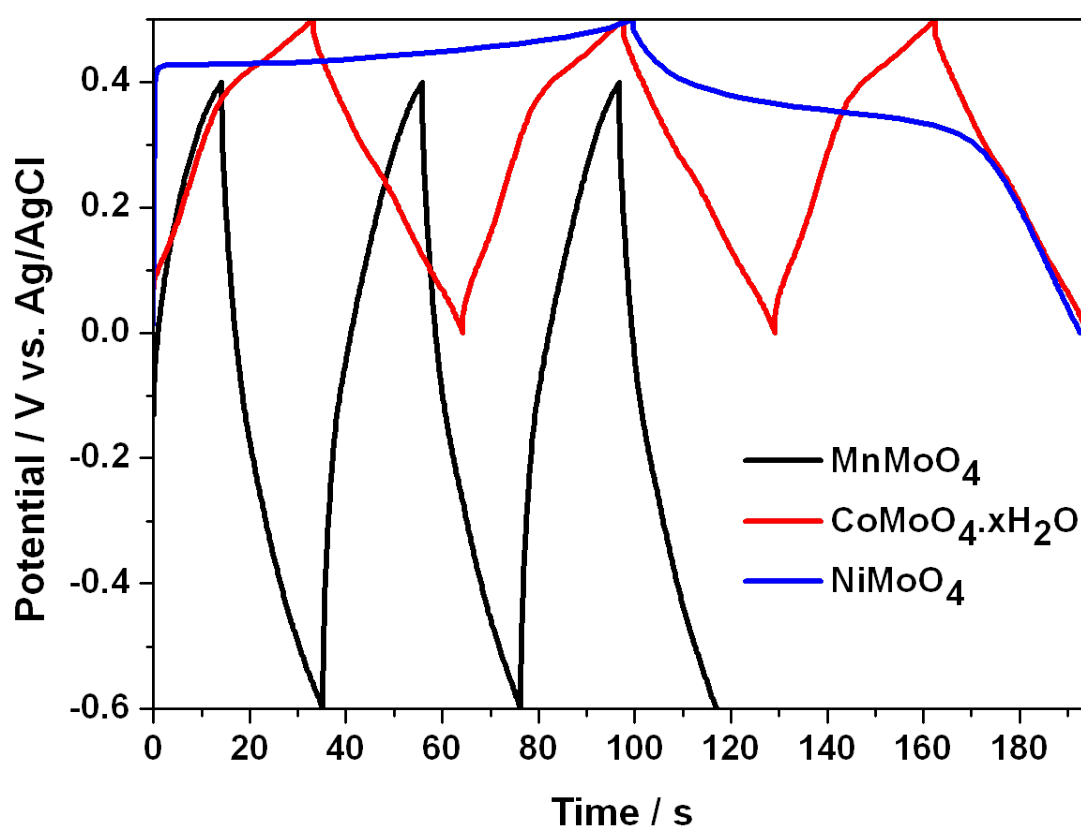

**Figure S1.** Galvanostatic charge-discharge cycles for MnMoO<sub>4</sub>, CoMoO<sub>4</sub>.xH<sub>2</sub>O and  $\alpha$ -NiMoO<sub>4</sub> at a current density of 5 mAcm<sup>-2</sup>

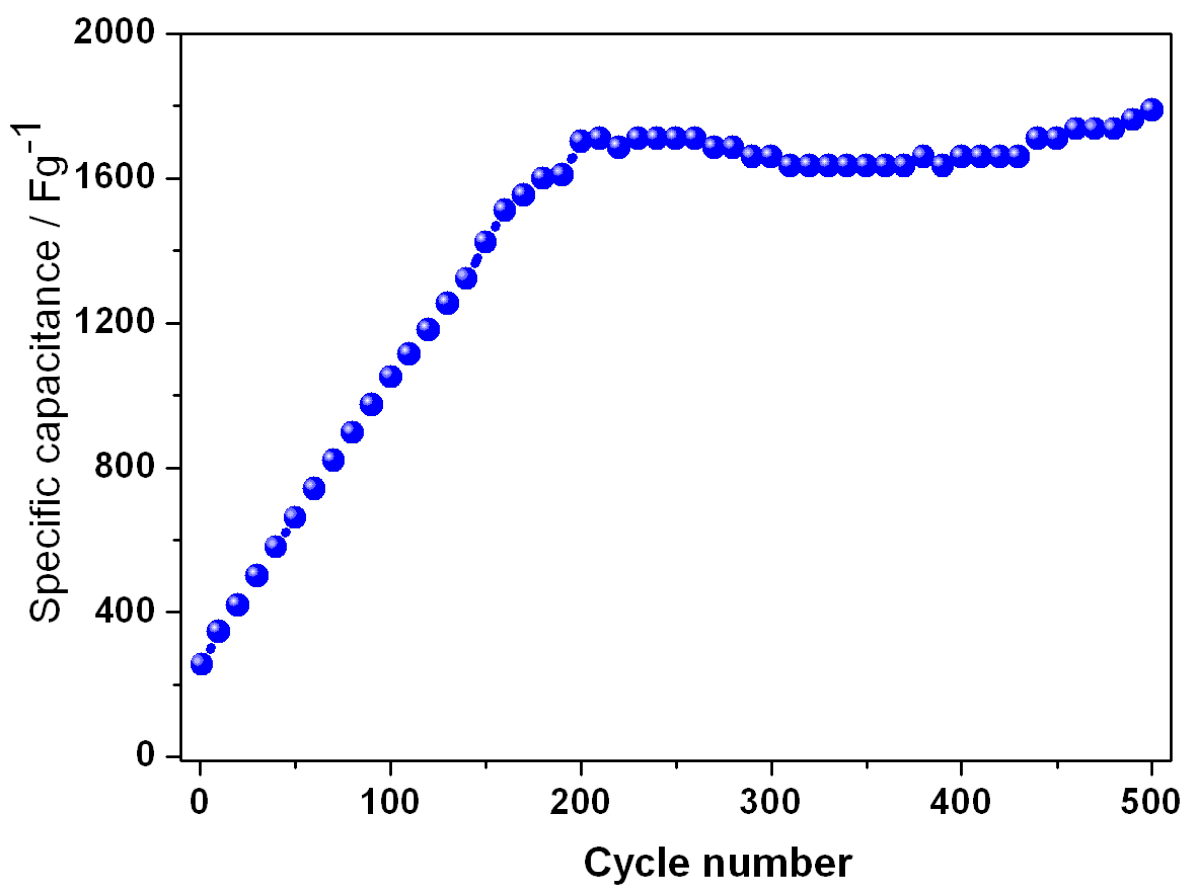

**Figure S2.** SC with cycle number for  $\alpha$ -NiMoO<sub>4</sub> calcined at 800 °C

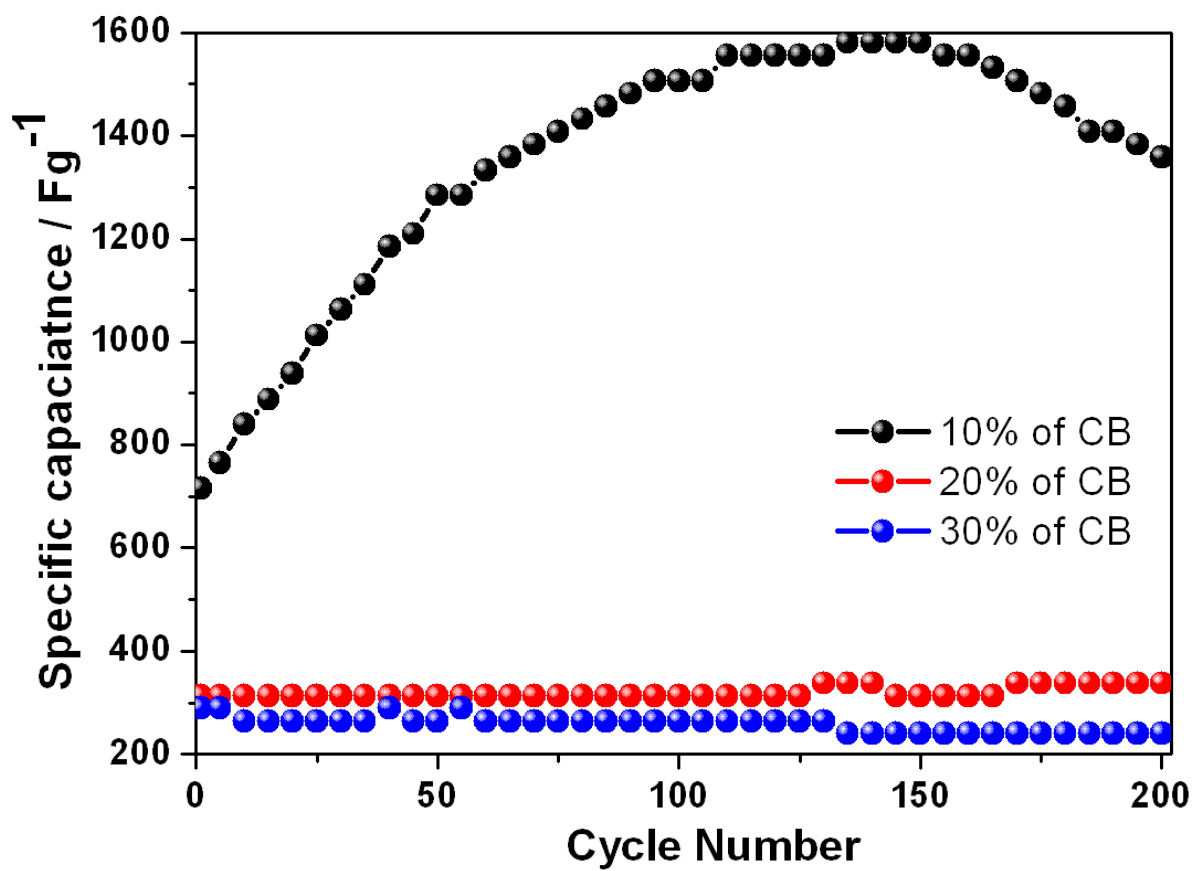

**Figure S3.** SC with cycle number for  $\alpha$ -NiMoO<sub>4</sub> with various percentages of carbon black (CB)
